# Supplementary material for: Ag10Cu16 nanoclusters with triple-ligand protection: total structure and electronic structure analysis
Source: Royal Society of Chemistry journal article supplement (doi:10.1039/d3cp02227g), 2023-01-01
Supplement: d3cp02227g1.pdf [file d3cp02227g1.pdf]

## Electronic Supplementary Information

### **Ag<sub>10</sub>Cu<sub>16</sub> Nanocluster with Triple-Ligand Protection: Total Structure and Electronic Structure Analysis**

Xueli Sun,<sup>†a</sup> Simin Li,<sup>†a</sup> Guolong Tian,<sup>†b</sup> Yanli Gao,<sup>c</sup> Jianyu Wei<sup>\*d</sup> and Hui Shen<sup>\*a</sup>

<sup>a</sup> College of Energy Materials and Chemistry, Inner Mongolia University, Hohhot 010021, China

<sup>b</sup> College of Chemistry and Chemical Engineering, Xiamen University, Xiamen 361005, China

<sup>c</sup> School of Chemistry and Chemical Engineering, Yulin University, Yulin 719000, China

<sup>d</sup> Ningxia Key Laboratory for Photovoltaic Materials, School of Materials and New Energy, Ningxia University, Yinchuan, Ningxia 750021, China

† These authors contributed equally to this work.

E-mail: shen@imu.edu.cn; jianyu.wei@nxu.edu.cn

## EXPERIMENTAL SECTION

**Reagents:** Copper (II) trifluoroacetate ( $\text{Cu}(\text{CF}_3\text{CO}_2)_2$ , 98%) was purchased from Adamas. (Shanghai, China). Silver trifluoroacetate ( $\text{AgCF}_3\text{CO}_2$ , 98%) and triphenylphosphine ( $\text{PPh}_3$ , 99%) was purchased from EnergyChemical. (Shanghai, China). Sodium borohydride ( $\text{NaBH}_4$ , 99%) and 2-phenylethylmercaptan ( $\text{C}_8\text{H}_{10}\text{S}$ , 99.5%) was purchased from Bide Pharmatech Ltd. (Beijing, China). Dichloromethane ( $\text{CH}_2\text{Cl}_2$ , A.R.), methanol ( $\text{CH}_3\text{OH}$ , A.R.) were purchased from Sinopharm Chemical Reagent Co. Ltd. (Shanghai, China). All other reagents were used as received without further purification.

**Synthesis of  $[\text{Ag}_{10}\text{Cu}_{16}(\text{C}_8\text{H}_9\text{S})_{16}(\text{PPh}_3)_4(\text{CF}_3\text{CO}_2)_8]$ :**  $\text{Cu}(\text{CF}_3\text{CO}_2)_2$  (22 mg, 0.076 mmol),  $\text{AgCF}_3\text{CO}_2$  (5.5 mg, 0.025 mmol),  $\text{C}_8\text{H}_{10}\text{S}$  (8  $\mu\text{L}$ , 0.060 mmol) and  $\text{PPh}_3$  (10 mg, 0.038 mmol) were dissolved in 4 ml of a mixed solvents of  $\text{CH}_2\text{Cl}_2$  and MeOH ( $\text{CH}_2\text{Cl}_2$ :MeOH = 3:1). The reducing agent, 40 mg  $\text{NaBH}_4$  in 1 mL ethanol, was then added dropwise, followed by stirring for 24 hours. The supernatant was harvested by centrifugation. After that, the solution was subjected to diffusion of hexane. Red block crystals were obtained after two weeks in the yield of ~34.5% (based on Ag). Elemental Anal. Theoretical: C, 41.55%; H, 3.29%; S, 8.22%; Found: C, 42.34%; H, 3.68%; S, 8.62%.

### Characterizations

UV/Vis spectra of  $\text{Ag}_{10}\text{Cu}_{16}$  cluster were collected by JascoV-650 Spectrophotometer using a quartz cuvette of 1 mm path length. The spectra were recorded in diluted solutions of dichloromethane and the signal of the blank solvent was subtracted.

Electrospray ionization mass spectra (ESI-MS) of  $\text{Ag}_{10}\text{Cu}_{16}$  cluster were recorded using an Agilent 6224 time-of-flight mass spectrometer in both positive and negative modes. The samples dissolved in dichloromethane were directly infused at a flow rate of 1.2 mL/h by a syringe pump. Typical parameters used for the measurements were as follows: capillary voltage: 4.0 kV; drying gas temp: 150°C; drying gas flow: 4 L/min; nebulizer pressure: 20 psi.

$^1\text{H}$  and  $^{13}\text{C}$  NMR spectra of  $\text{Ag}_{10}\text{Cu}_{16}$  cluster were recorded at room temperature on a Bruker AV-600 spectrometer with TMS and solvent residual signal as an internal reference. All NMR data were processed on MestReNova software.

X-ray single-crystal analysis: The diffraction data of the single crystals of  $\text{Ag}_{10}\text{Cu}_{16}$  cluster was collected on a Rigaku Oxford Diffraction system X-ray single-crystal diffractometer using  $\text{Cu K}\alpha$  ( $\lambda = 1.54184 \text{ \AA}$ ) at 100 K. The data was processed using CrysAlis<sup>Pro</sup>. The structure was solved and refined using Full-matrix least-squares based on  $F^2$  using ShelXT,<sup>1</sup> ShelXL<sup>2</sup> in Olex2,<sup>3</sup> and Shelxl.<sup>4</sup> The thermal ellipsoids of the ORTEP diagram were done at 50% probability. Detailed crystal data and structure refinements for the compound is given in Table S1. CCDC 2257991 contains the

supplementary crystallographic data for this paper. These data are provided free of charge by The Cambridge Crystallographic Data Centre.

### **Computational Details**

Density functional theory (DFT) calculations were performed by using Gaussian 16 package.<sup>5</sup> The generalized gradient approximation (GGA) Perdew–Burke–Ernzerhof (PBE) exchange-correlation functional,<sup>6,7</sup> together with an all-electron triple-z-polarized Def2\_TZVP<sup>8</sup> basis set were used. Dispersion forces were considered via the empirical pairwise corrections of Grimme (DFT-D3).<sup>9</sup> The plots of the molecular orbitals were generated by using Multiwfn software<sup>10</sup> with an isovalue of 0.02 (e/bohr<sup>3</sup>)<sup>1/2</sup>.

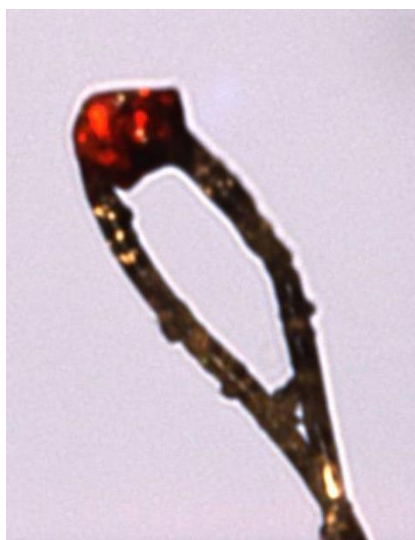

**Figure S1.** Digital photographs of single crystals of Ag<sub>10</sub>Cu<sub>16</sub> cluster.

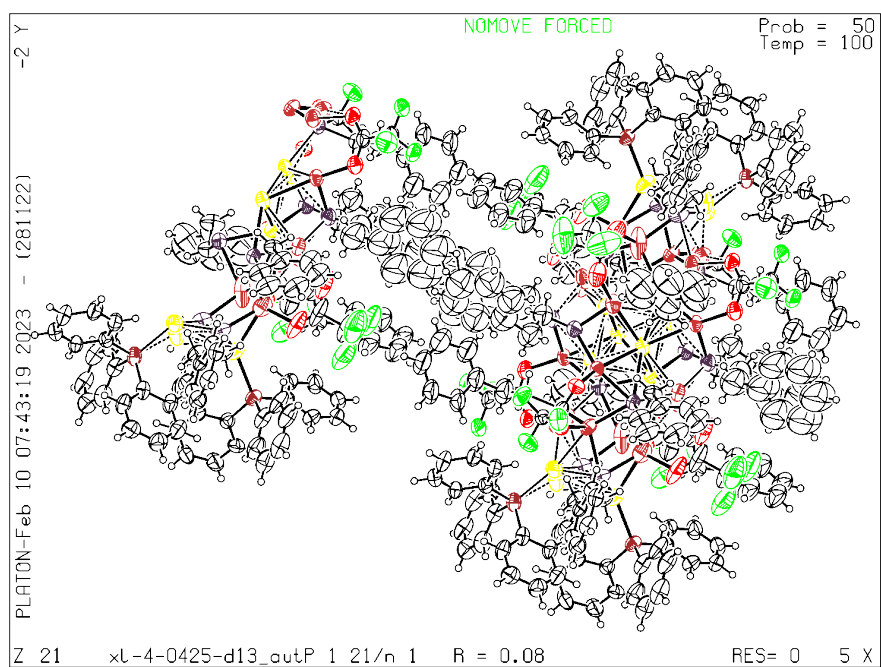

**Figure S2.** The thermal ellipsoids of the ORTEP diagram of Ag<sub>10</sub>Cu<sub>16</sub> cluster.

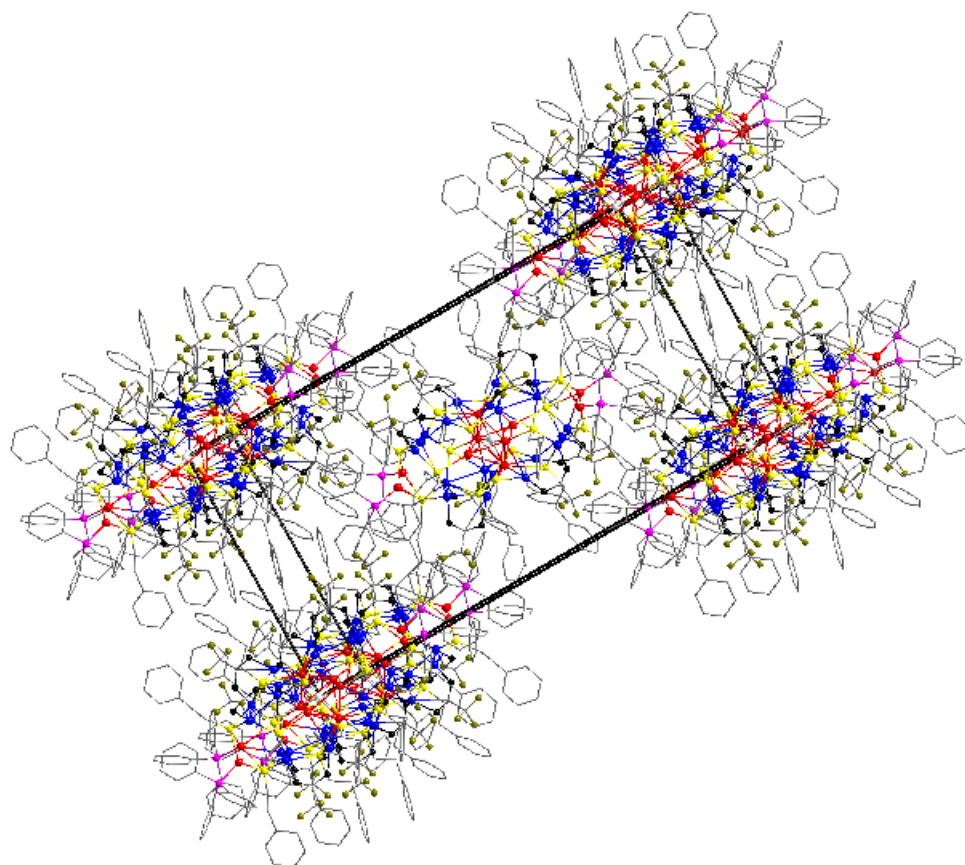

**Figure S3.** The packing structure of  $\text{Ag}_{10}\text{Cu}_{16}$  clusters in their single crystals. Color legend: red spheres, Ag; blue spheres, Cu; pink spheres, P; yellow spheres, S; brown spheres, F; black spheres, O; gray spheres, C. All hydrogen atoms are omitted for clarity.

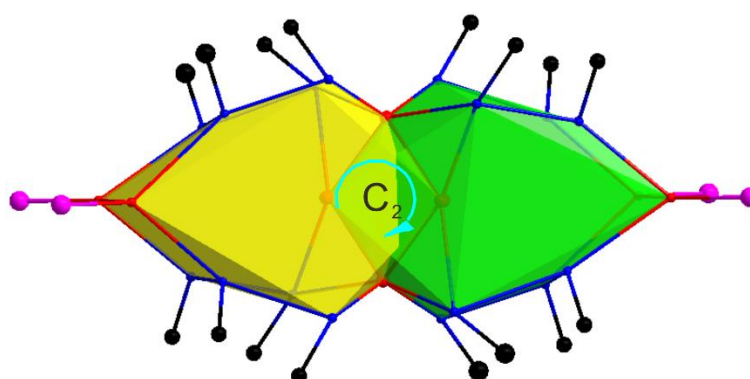

**Figure S4.** Structure of  $\text{Ag}_{10}\text{Cu}_{16}$  showing the crystallographic  $C_2$  symmetry axis. Color legend: red spheres, Ag; blue spheres, Cu; pink spheres, P; black spheres, O; gray spheres, C. All other atoms are omitted for clarity.

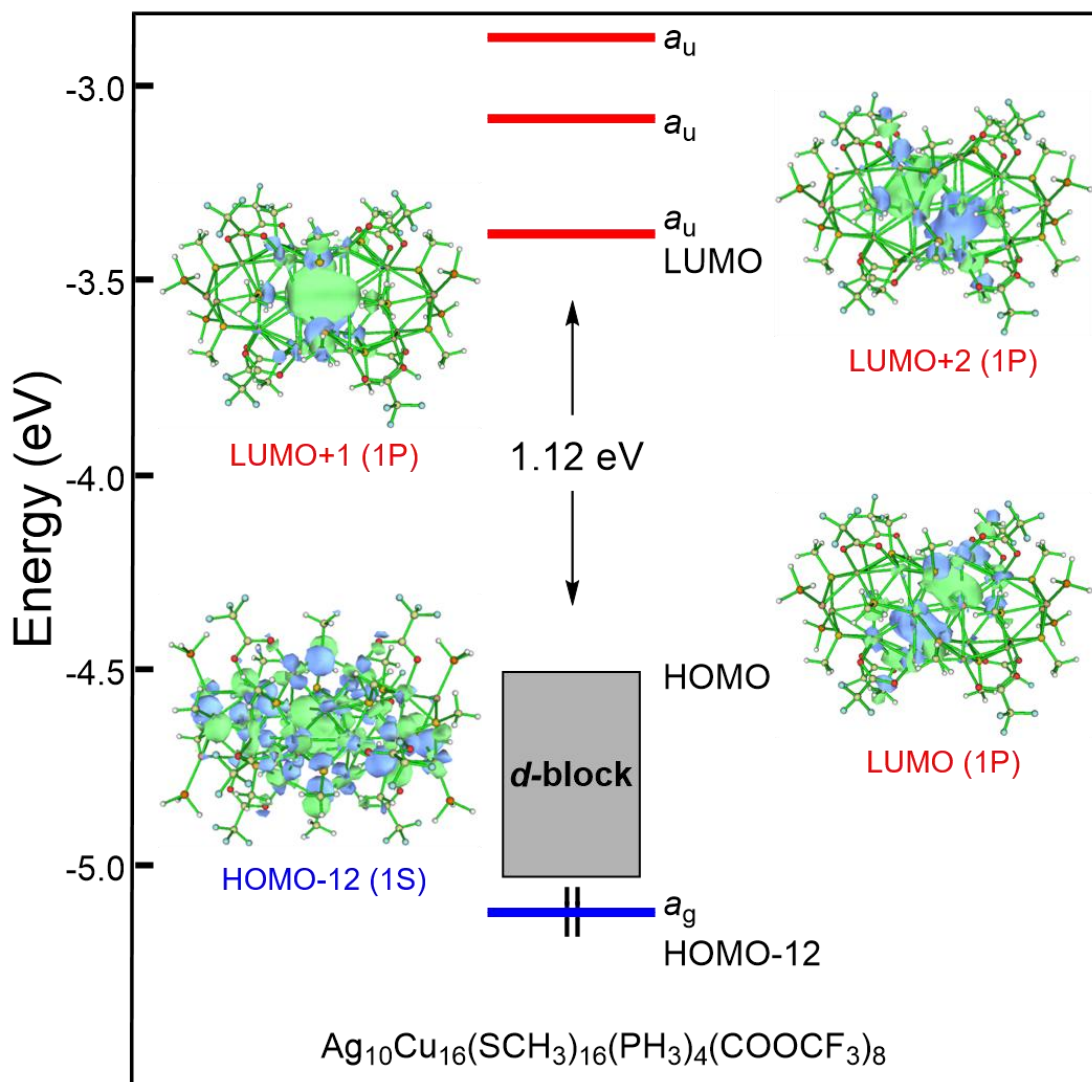

**Figure S5.** Kohn-Sham MO diagram of  $\text{Ag}_{10}\text{Cu}_{16}(\text{SCH}_3)_{16}(\text{PH}_3)_4(\text{CF}_3\text{CO}_2)_8$  with the plots of the occupied *superatomic* 1S orbital (blue stick) and three vacant *superatomic* 1P orbitals (red sticks). The isovalue is 0.02 ( $e/\text{bohr}^3$ )<sup>1/2</sup>.

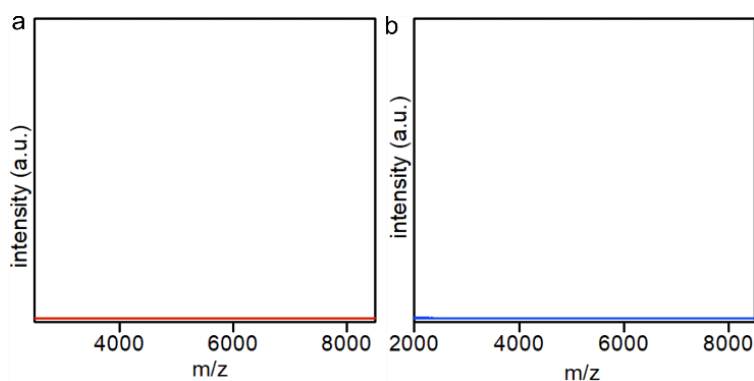

**Figure S6.** ESI-MS of  $\text{Ag}_{10}\text{Cu}_{16}$  clusters in the positive and negative mode. The absence of molecular peaks suggests the neutral state of the cluster.

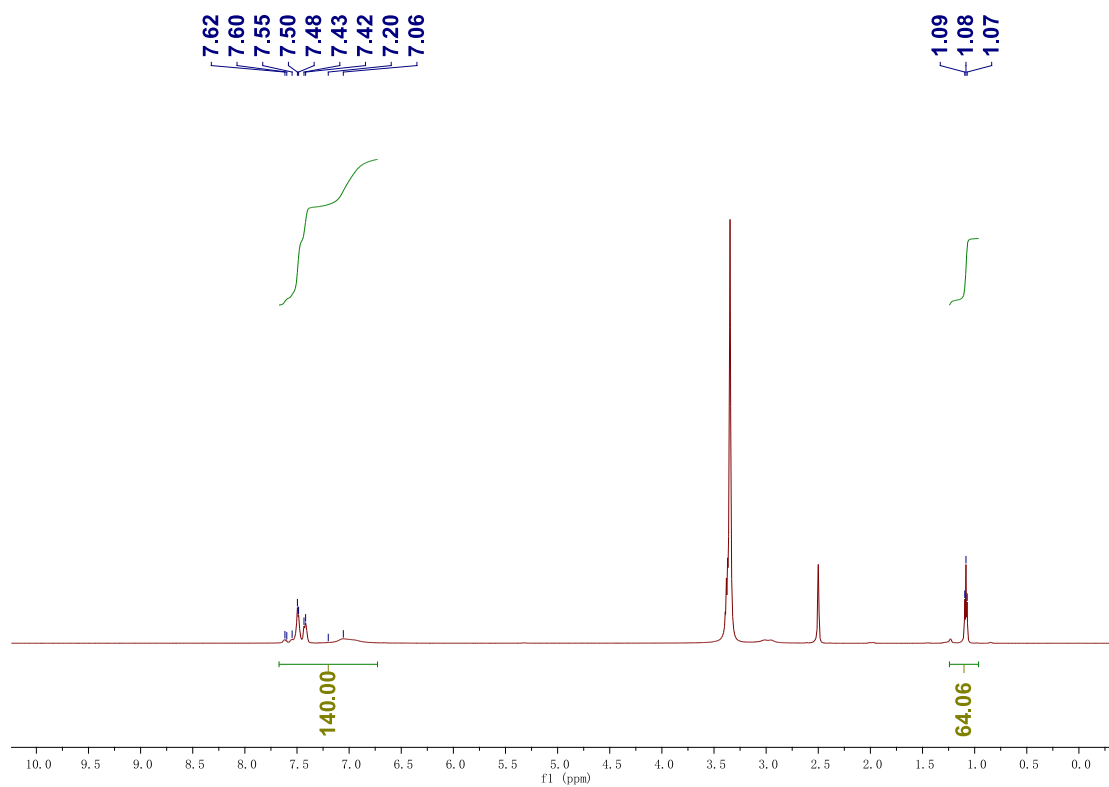

**Figure S7.**  $^1\text{H}$  NMR of  $\text{Ag}_{10}\text{Cu}_{16}$  clusters in  $\text{d}_6$ -DMSO.

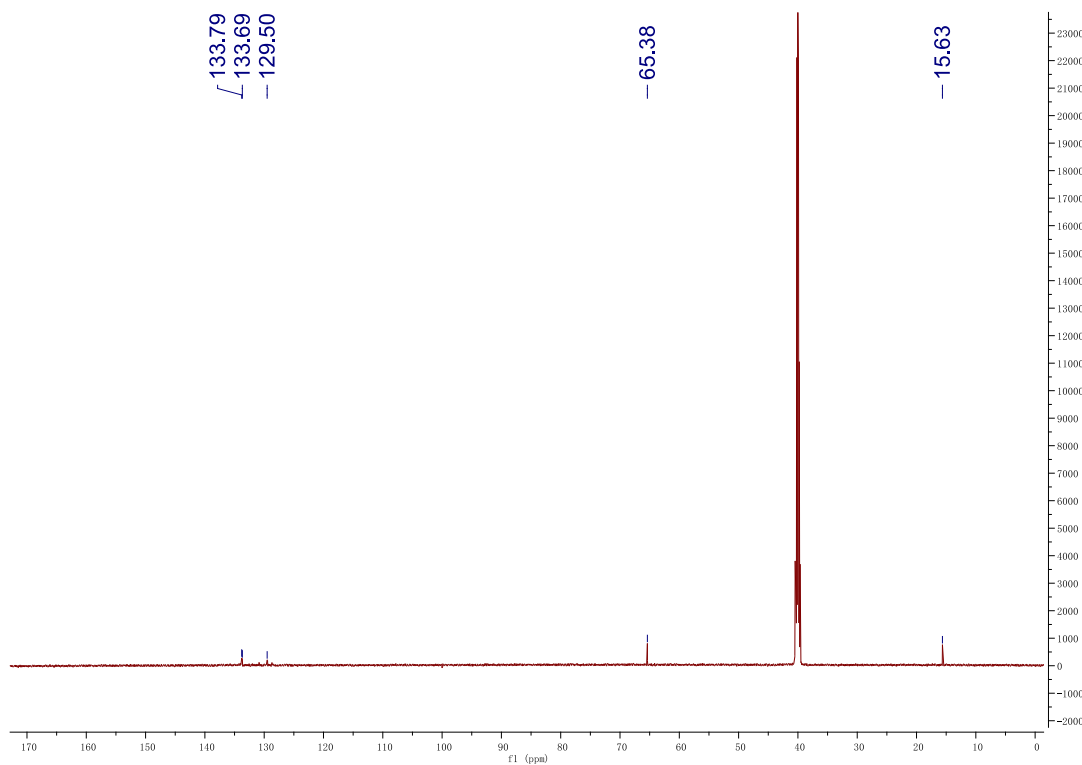

**Figure S8.**  $^{13}\text{C}$  NMR of  $\text{Ag}_{10}\text{Cu}_{16}$  clusters in  $\text{d}_6$ -DMSO.

**Table S1. Crystal data and structure refinement for  $\text{Ag}_{10}\text{Cu}_{16}(\text{C}_8\text{H}_9\text{S})_{16}(\text{PPh}_3)_4(\text{CF}_3\text{CO}_2)_8$ .**

---

|                                               |                                                                                                             |
|-----------------------------------------------|-------------------------------------------------------------------------------------------------------------|
| Identification code                           | cif-revised                                                                                                 |
| Empirical formula                             | $\text{C}_{216}\text{H}_{204}\text{Ag}_{10}\text{Cu}_{16}\text{F}_{24}\text{O}_{16}\text{P}_4\text{S}_{16}$ |
| Formula weight                                | 6243.96                                                                                                     |
| Temperature/K                                 | 100(1)                                                                                                      |
| Crystal system                                | monoclinic                                                                                                  |
| Space group                                   | $\text{P}2_1/\text{n}$                                                                                      |
| $a/\text{\AA}$                                | 18.3848(2)                                                                                                  |
| $b/\text{\AA}$                                | 34.2944(4)                                                                                                  |
| $c/\text{\AA}$                                | 18.6956(2)                                                                                                  |
| $\alpha/^\circ$                               | 90                                                                                                          |
| $\beta/^\circ$                                | 96.2820(10)                                                                                                 |
| $\gamma/^\circ$                               | 90                                                                                                          |
| Volume/ $\text{\AA}^3$                        | 11716.7(2)                                                                                                  |
| Z                                             | 2                                                                                                           |
| $\rho_{\text{calc}}/\text{g/cm}^3$            | 1.770                                                                                                       |
| $\mu/\text{mm}^{-1}$                          | 10.258                                                                                                      |
| F(000)                                        | 6188.0                                                                                                      |
| Radiation                                     | $\text{CuK}\alpha$ ( $\lambda = 1.54184$ )                                                                  |
| $2\Theta$ range for data collection/ $^\circ$ | 5.154 to 128                                                                                                |
| Index ranges                                  | $-21 \leq h \leq 21, -39 \leq k \leq 33, -21 \leq l \leq 18$                                                |
| Reflections collected                         | 121130                                                                                                      |
| Independent reflections                       | 19432 [ $R_{\text{int}} = 0.0479$ $R_{\text{sigma}} = 0.0296$ ]                                             |
| Data/restraints/parameters                    | 19432 /921/1492                                                                                             |
| Goodness-of-fit on $F^2$                      | 1.097                                                                                                       |
| Final R indexes [ $I \geq 2\sigma(I)$ ]       | $R_1 = 0.0778, wR_2 = 0.2393$                                                                               |
| Final R indexes [all data]                    | $R_1 = 0.0932, wR_2 = 0.2525$                                                                               |
| Largest diff. peak/hole / $e \text{\AA}^{-3}$ | 1.97/-2.07                                                                                                  |

---



**Table S2. Selected bond lengths (Å) for cluster Ag<sub>10</sub>Cu<sub>16</sub>.**

| Parameter | value      | Parameter | value      |
|-----------|------------|-----------|------------|
| Ag01-Ag02 | 2.8090(12) | Ag05-Cu0C | 3.204(3)   |
| Ag01-Ag03 | 2.8733(11) | Ag05-S00G | 2.840(3)   |
| Ag01-Ag03 | 2.8235(11) | Ag05-S00I | 2.477(3)   |
| Ag01-Cu06 | 2.6962(16) | Ag05-S00K | 2.589(3)   |
| Ag01-Cu08 | 2.6731(17) | Ag05-P00L | 2.341(3)   |
| Ag01-Cu09 | 2.721(2)   | Cu06-Ag01 | 2.6963(16) |
| Ag01-Cu0B | 2.687(2)   | Cu06-Cu07 | 2.885(2)   |
| Ag01-S00E | 2.762(3)   | Cu06-Cu09 | 3.037(2)   |
| Ag01-S00F | 2.842(3)   | Cu06-S00E | 2.250(3)   |
| Ag02-Ag01 | 2.8050(12) | Cu06-S00N | 2.183(4)   |
| Ag02-Ag03 | 2.8013(14) | Cu06-O00O | 2.059(7)   |
| Ag02-Ag03 | 2.7850(14) | Cu07-Ag05 | 3.145(2)   |
| Ag02-Cu09 | 2.8259(18) | Cu07-Cu0A | 2.828(3)   |
| Ag02-Cu0B | 2.888(2)   | Cu07-S00E | 2.411(3)   |
| Ag02-S00H | 2.471(3)   | Cu07-S00G | 2.270(3)   |
| Ag02-S00N | 2.774(4)   | Cu07-S00I | 2.357(3)   |
| Ag03-Ag01 | 2.8734(11) | Cu07-O00Q | 2.116(7)   |
| Ag03-Ag02 | 2.8013(14) | Cu08-Cu0C | 2.858(3)   |
| Ag03-Cu06 | 3.0910(16) | Cu08-S00F | 2.242(3)   |
| Ag03-Cu08 | 2.9898(17) | Cu08-S00M | 2.193(4)   |
| Ag03-S00G | 2.453(3)   | Cu08-O00W | 2.063(8)   |
| Ag04-Ag05 | 3.1044(15) | Cu09-Ag01 | 2.7211(19) |
| Ag04-Cu0A | 2.983(3)   | Cu09-S00F | 2.235(3)   |
| Ag04-Cu00 | 3.175(4)   | Cu09-S00N | 2.203(4)   |
| Ag04-S00I | 2.524(3)   | Cu09-O010 | 2.074(10)  |
| Ag04-P00J | 2.315(3)   | Cu0A-Cu07 | 2.828(3)   |
| Ag04-S00K | 2.436(3)   | Cu0A-S00H | 2.218(3)   |
| Ag05-Cu07 | 3.146(2)   | Cu0A-S00I | 2.203(4)   |
| Cu0A-O00Z | 2.039(9)   | Cu0C-S00K | 2.306(4)   |
| Cu0B-S00E | 2.259(3)   | Cu0C-O00V | 2.049(8)   |

|           |           |           |          |
|-----------|-----------|-----------|----------|
| Cu0B-S00M | 2.173(4)  | Cu00-Cu0C | 2.749(3) |
| Cu0B-O019 | 2.112(13) | Cu00-S00F | 2.691(4) |
| Cu0C-Ag05 | 3.204(3)  | Cu00-S00H | 2.230(4) |
| Cu0C-Cu00 | 2.749(3)  | Cu00-S00K | 2.283(5) |
| Cu0C-S00F | 2.560(4)  | Cu00-O00Y | 2.064(9) |
| Cu0C-S00G | 2.256(4)  |           |          |

**Table S3. Optimized Fractional Atomic Coordinates of Ag<sub>10</sub>Cu<sub>16</sub>.**

|    |           |           |           |   |           |           |           |
|----|-----------|-----------|-----------|---|-----------|-----------|-----------|
| Ag | -0.264559 | 0.2635    | -1.969589 | C | -0.17597  | 6.58254   | 3.288486  |
| Ag | -1.578947 | 1.166386  | 0.341092  | H | 0.725856  | 6.304802  | 3.846886  |
| Ag | -1.663288 | 6.564344  | -0.126737 | H | -0.20318  | 7.668632  | 3.146748  |
| Cu | -1.829484 | -1.613665 | 2.987925  | C | -4.25816  | 4.307407  | 4.92573   |
| Cu | -1.371942 | -4.162981 | 2.34541   | H | -1.07709  | 6.249661  | 3.816502  |
| Cu | -2.15874  | -1.464149 | -2.779215 | C | -4.131847 | -3.283702 | 0.232404  |
| Cu | -1.808429 | 1.224274  | 3.044265  | H | -4.661392 | -3.863851 | 0.997346  |
| Cu | -1.364672 | -3.820596 | -1.758897 | H | -4.243897 | -2.209693 | 0.422197  |
| Cu | -1.190648 | 3.577905  | 1.838875  | H | 0.463726  | 2.433298  | 5.709853  |
| Cu | -1.164295 | 4.580237  | -2.022178 | H | -4.126624 | 4.505573  | 0.836283  |
| Ag | 0.264559  | -0.2635   | 1.969589  | C | -3.984789 | 3.746127  | 0.058978  |
| Ag | 1.578947  | -1.166386 | -0.341092 | H | -4.468141 | 4.038691  | -0.879667 |
| Cu | 1.829484  | 1.613665  | -2.987925 | H | -4.389922 | 2.783963  | 0.393359  |
| Cu | 1.371942  | 4.162981  | -2.34541  | C | -4.788525 | 5.040125  | -4.342757 |
| Cu | 2.15874   | 1.464149  | 2.779215  | H | -4.509902 | -3.528505 | -0.76651  |
| Cu | 1.808429  | -1.224274 | -3.044265 | H | -4.346167 | 0.582219  | -4.236578 |
| Cu | 1.364672  | 3.820596  | 1.758897  | C | -4.792899 | 0.213302  | -3.308707 |
| Cu | 1.190648  | -3.577905 | -1.838875 | H | -5.2307   | -0.777201 | -3.47076  |
| Cu | 1.164295  | -4.580237 | 2.022178  | H | -5.554359 | 0.926735  | -2.973052 |
| Ag | 1.663288  | -6.564344 | 0.126737  | S | 0.21441   | -2.593927 | 3.19392   |
| Cu | -2.344369 | 2.029442  | -2.190368 | S | -0.151336 | -2.334363 | -3.317052 |
| Ag | -1.175646 | -1.607086 | -0.09443  | S | -0.400223 | -6.269318 | 1.800341  |
| Ag | 1.993971  | 6.396138  | 0.212826  | S | 0.117185  | -5.763801 | -1.655712 |
| Cu | 2.344369  | -2.029442 | 2.190368  | S | -3.174412 | -0.185365 | 1.947861  |
| Ag | 1.175646  | 1.607086  | 0.09443   | S | 2.362302  | 3.736019  | -0.316235 |
| Ag | -1.993971 | -6.396138 | -0.212826 | S | 2.189608  | -3.53735  | 0.242616  |
| S  | -0.21441  | 2.593927  | -3.19392  | S | 3.532091  | -0.083067 | 1.971722  |
| S  | 0.151336  | 2.334363  | 3.317052  | P | 3.636702  | -7.540661 | 0.979105  |
| S  | -2.362302 | -3.736019 | 0.316235  | F | 3.314561  | 3.838757  | -6.994888 |
| S  | -2.189608 | 3.53735   | -0.242616 | F | 5.674455  | 4.908746  | 3.703738  |

|   |           |           |           |   |           |           |           |
|---|-----------|-----------|-----------|---|-----------|-----------|-----------|
| S | 0.400223  | 6.269318  | -1.800341 | F | 5.152378  | 3.930926  | 5.590925  |
| S | -0.117185 | 5.763801  | 1.655712  | F | 5.158518  | 3.50578   | -5.854703 |
| S | -3.532091 | 0.083067  | -1.971722 | F | 4.206087  | 5.470585  | -5.844757 |
| P | -3.636702 | 7.540661  | -0.979105 | F | 4.209261  | 5.825071  | 5.054473  |
| F | -3.314561 | -3.838757 | 6.994888  | F | 5.384436  | -4.194537 | 5.204278  |
| F | -5.674455 | -4.908746 | -3.703738 | F | 5.006283  | -3.491481 | -5.691467 |
| F | -5.152378 | -3.930926 | -5.590925 | F | 4.479609  | -6.170874 | 5.01442   |
| F | -5.158518 | -3.50578  | 5.854703  | F | 5.713991  | -5.376628 | 3.387602  |
| F | -4.206087 | -5.470585 | 5.844757  | F | 5.101904  | -5.084911 | -4.203122 |
| F | -4.209261 | -5.825071 | -5.054473 | F | 3.554479  | -5.12832  | -5.757282 |
| F | -5.384436 | 4.194537  | -5.204278 | O | 2.984853  | 2.443706  | -4.505918 |
| F | -5.006283 | 3.491481  | 5.691467  | O | 2.622524  | 4.611839  | -3.907038 |
| F | -4.479609 | 6.170874  | -5.01442  | O | 2.820334  | 4.622354  | 3.051206  |
| F | -5.713991 | 5.376628  | -3.387602 | O | 3.465356  | 2.641775  | 3.973696  |
| F | -5.101904 | 5.084911  | 4.203122  | O | 2.739139  | -4.2496   | -3.107666 |
| F | -3.554479 | 5.12832   | 5.757282  | O | 2.645744  | -5.22319  | 3.31376   |
| O | -2.984853 | -2.443706 | 4.505918  | O | 3.0875    | -2.320844 | -4.270087 |
| O | -2.622524 | -4.611839 | 3.907038  | O | 3.638795  | -3.17259  | 3.418847  |
| O | -2.820334 | -4.622354 | -3.051206 | C | 3.105289  | 3.692064  | -4.616999 |
| O | -3.465356 | -2.641775 | -3.973696 | C | 3.521224  | 3.880088  | 3.795281  |
| O | -2.739139 | 4.2496    | 3.107666  | C | 3.962592  | 4.14335   | -5.838347 |
| O | -2.645744 | 5.22319   | -3.31376  | H | 4.745104  | -6.68276  | 1.194132  |
| O | -3.0875   | 2.320844  | 4.270087  | C | 0.492131  | -2.765261 | 4.995406  |
| O | -3.638795 | 3.17259   | -3.418847 | H | 1.166289  | -3.614686 | 5.152658  |
| C | -3.105289 | -3.692064 | 4.616999  | H | -0.468776 | -2.938321 | 5.49105   |
| C | -3.521224 | -3.880088 | -3.795281 | H | 0.952158  | -1.843617 | 5.368043  |
| C | -3.962592 | -4.14335  | 5.838347  | C | -0.451057 | -7.265199 | 3.338006  |
| H | -4.745104 | 6.68276   | -1.194132 | H | 0.474699  | -7.085946 | 3.896867  |
| C | -0.492131 | 2.765261  | -4.995406 | H | -0.532345 | -8.325647 | 3.073276  |
| H | -1.166289 | 3.614686  | -5.152658 | H | -1.318104 | -6.949401 | 3.929419  |
| H | 0.468776  | 2.938321  | -5.49105  | H | 4.342446  | -8.609092 | 0.360864  |
| H | -0.952158 | 1.843617  | -5.368043 | C | 4.647516  | 4.637073  | 4.565448  |
| C | 0.451057  | 7.265199  | -3.338006 | C | -0.205595 | -3.172961 | -4.944853 |
| H | -0.474699 | 7.085946  | -3.896867 | H | -0.965171 | -3.960143 | -4.903731 |
| H | 0.532345  | 8.325647  | -3.073276 | H | 0.780649  | -3.601581 | -5.148954 |
| H | 1.318104  | 6.949401  | -3.929419 | H | 3.567083  | -8.083376 | 2.287544  |
| H | -4.342446 | 8.609092  | -0.360864 | C | 3.552596  | -4.40479  | 3.633713  |
| C | -4.647516 | -4.637073 | -4.565448 | C | 3.266576  | -3.536499 | -4.000237 |
| C | 0.205595  | 3.172961  | 4.944853  | C | 0.17597   | -6.58254  | -3.288486 |
| H | 0.965171  | 3.960143  | 4.903731  | H | -0.725856 | -6.304802 | -3.846886 |
| H | -0.780649 | 3.601581  | 5.148954  | H | 0.20318   | -7.668632 | -3.146748 |
| H | -3.567083 | 8.083376  | -2.287544 | C | 4.25816   | -4.307407 | -4.92573  |
| C | -3.552596 | 4.40479   | -3.633713 | H | 1.07709   | -6.249661 | -3.816502 |

|   |           |           |           |   |          |          |           |
|---|-----------|-----------|-----------|---|----------|----------|-----------|
| C | -3.266576 | 3.536499  | 4.000237  | C | 4.131847 | 3.283702 | -0.232404 |
| H | 4.243897  | 2.209693  | -0.422197 |   |          |          |           |
| H | -0.463726 | -2.433298 | -5.709853 |   |          |          |           |
| H | 4.126624  | -4.505573 | -0.836283 |   |          |          |           |
| C | 3.984789  | -3.746127 | -0.058978 |   |          |          |           |
| H | 4.468141  | -4.038691 | 0.879667  |   |          |          |           |
| H | 4.389922  | -2.783963 | -0.393359 |   |          |          |           |
| C | 4.788525  | -5.040125 | 4.342757  |   |          |          |           |
| H | 4.509902  | 3.528505  | 0.76651   |   |          |          |           |
| H | 4.346167  | -0.582219 | 4.236578  |   |          |          |           |
| C | 4.792899  | -0.213302 | 3.308707  |   |          |          |           |
| H | 5.2307    | 0.777201  | 3.47076   |   |          |          |           |
| H | 5.554359  | -0.926735 | 2.973052  |   |          |          |           |
| S | 3.174412  | 0.185365  | -1.947861 |   |          |          |           |
| P | 3.890035  | 7.265588  | 1.321028  |   |          |          |           |
| H | 4.997944  | 6.392346  | 1.466481  |   |          |          |           |
| H | 3.739797  | 7.595515  | 2.691984  |   |          |          |           |
| H | 4.617426  | 8.422287  | 0.92473   |   |          |          |           |
| P | -3.890035 | -7.265588 | -1.321028 |   |          |          |           |
| H | -4.997944 | -6.392346 | -1.466481 |   |          |          |           |
| H | -3.739797 | -7.595515 | -2.691984 |   |          |          |           |
| H | -4.617426 | -8.422287 | -0.92473  |   |          |          |           |
| C | -4.808058 | -0.018172 | 2.780921  |   |          |          |           |
| C | 4.808058  | 0.018172  | -2.780921 |   |          |          |           |
| H | -4.859613 | 0.940512  | 3.305954  |   |          |          |           |
| H | -5.582778 | -0.083765 | 2.007571  |   |          |          |           |
| H | -4.904736 | -0.841631 | 3.497401  |   |          |          |           |
| H | 4.859613  | -0.940512 | -3.305954 |   |          |          |           |
| H | 5.582778  | 0.083765  | -2.007571 |   |          |          |           |
| H | 4.904736  | 0.841631  | -3.497401 |   |          |          |           |

## References

1. Sheldrick, G. M. SHELXT-integrated space-group and crystal-structure determination. *Acta Cryst. A* **2015**, *71*, 3-8.
2. Sheldrick, G. M. A short history of SHELX. *Acta Cryst. A* **2008**, *64*, 112-122.
3. Dolomanov, O. V.; Bourhis, L. J.; Gildea, R. J.; Howard, J. A. K.; Puschmann, H. OLEX2: a complete structure solution, refinement and analysis program. *J. Appl. Cryst.* **2009**, *42*, 339-341.
4. Hubschle, C. B.; Sheldrick, G. M.; Dittrich, B. ShelXle: a Qt graphical user interface for SHELXL. *J. Appl. Cryst.* **2011**, *44*, 1281-1284.
5. Frisch, M. J.; Trucks, G. W.; Schlegel, H. B.; Scuseria, G. E.; Robb, M. A.; Cheeseman, J. R.; Scalmani, G.; Barone, V.; Petersson, G. A.; Nakatsuji, H.; Li, X.; Caricato, M.; Marenich, A. V.; Bloino, J.; Janesko, B. G.; Gomperts, R.; Mennucci, B.; Hratchian, H. P.; Ortiz, J. V.; Izmaylov, A. F.; Sonnenberg, J. L.; Williams-Young, D.; Ding, F.; Lipparini, F.; Egidi, F.; Goings, J.; Peng, B.; Petrone, A.; Henderson, T.; Ranasinghe, D.; Zakrzewski, V. G.; Gao, J.; Rega, N.; Zheng, G.; Liang, W.; Hada, M.; Ehara, M.; Toyota, K.; Fukuda, R.; Hasegawa, J.; Ishida, M.; Nakajima, T.; Honda, Y.; Kitao, O.; Nakai, H.; Vreven, T.; Throssell, K.; Montgomery, J. A., Jr.; Peralta, J. E.; Ogliaro, F.; Bearpark, M. J.; Heyd, J. J.; Brothers, E. N.; Kudin, K. N.; Staroverov, V. N.; Keith, T. A.; Kobayashi, R.; Normand, J.; Raghavachari, K.; Rendell, A. P.; Burant, J. C.; Iyengar, S. S.; Tomasi, J.; Cossi, M.; Millam, J. M.; Klene, M.; Adamo, C.; Cammi, R.; Ochterski, J. W.; Martin, R. L.; Morokuma, K.; Farkas, O.; Foresman, J. B.; Fox, D. J. *Gaussian16*, Gaussian, Inc.: Wallingford, CT, **2016**.
6. Perdew, J. P.; Burke, K.; Wang, Y. Generalized Gradient Approximation for the Exchange-Correlation Hole of a Many-Electron System. *Phys. Rev. B* **1996**, *54*, 16533-16539.
7. Perdew, J. P.; Burke, K.; Ernzerhof, M. Generalized Gradient Approximation Made Simple. *Phys. Rev. Lett.* **1997**, *78*, 1396-1396.
8. Weigend, F.; Ahlrichs, R. "Balanced basis sets of split valence, triple zeta valence and quadruple zeta valence quality for H to Rn: Design and assessment of accuracy," *Phys. Chem. Chem. Phys.* **2005**, *7*, 3297-305.
9. Grimme, S. Semiempirical GGA-type density functional constructed with a long-range dispersion correction. *J. Comput. Chem.* **2006**, *27*, 1787-1799.
10. Lu, T.; Chen, F. Multiwfn: A multifunctional wavefunction analyzer. *J. Comput. Chem.* **2012**, *33*, 580-592.
